# Supplementary material for: Intermittent Fasting Reduces Neuroinflammation and Cognitive Impairment in High-Fat Diet-Fed Mice by Downregulating Lipocalin-2 and Galectin-3
Source: MDPI journal article supplement (doi:10.3390/nu16010159), 2024-01-03
Supplement: s1 [file s1]

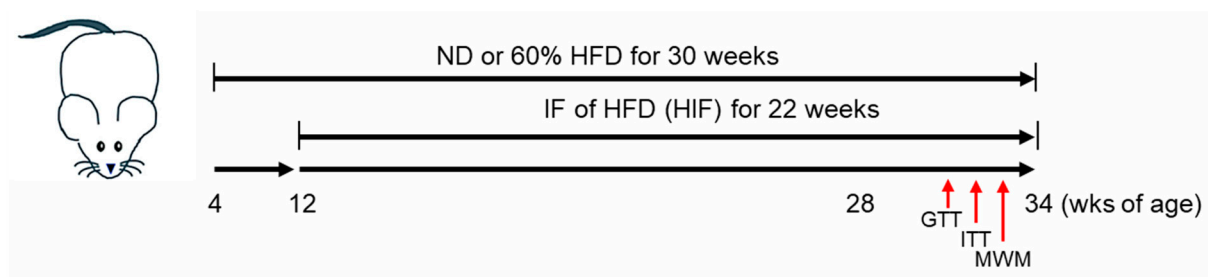

**Supplementary Figure S1. Experimental scheme of IF protocol in HFD mice.** Mice in the ND and HFD groups were fed a ND or HFD for 32 weeks, whereas mice in the HIF group were fed an HFD for 8 weeks and then switched to an IF protocol consisting of alternating 24-h periods of fasting and feeding for 22 weeks. ND; normal diet, HFD; high-fat diet, HIF; HFD + intermittent fasting (IF), GTT; glucose tolerance test, ITT; insulin tolerance test, MWM; Morris water maze.

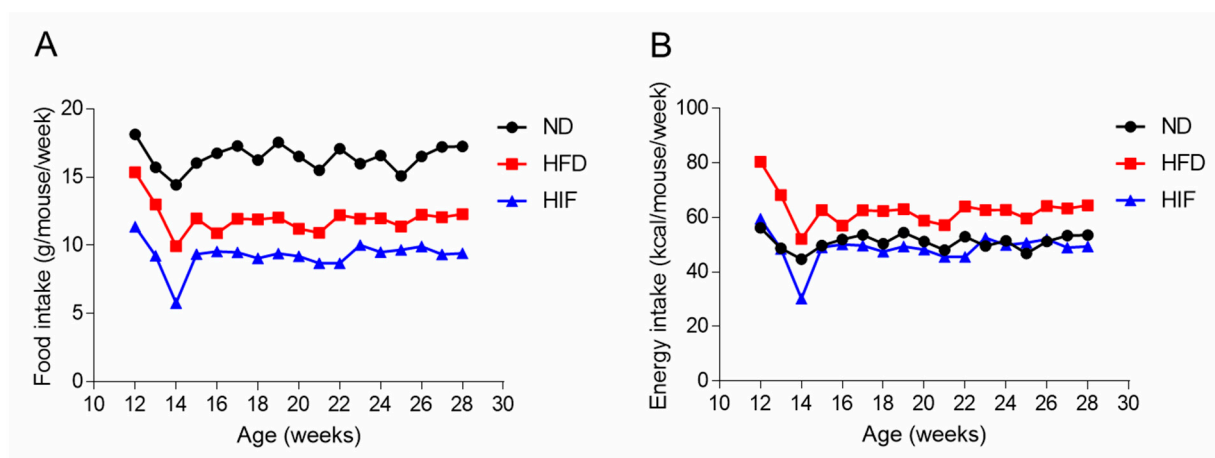

**Supplementary Figure S2. Effects of IF on food intake and energy intake in HFD mice.** (A) Food intake and (B) Energy intake every other day for 16 weeks at 12 weeks.

**Supplementary Table S1. List of primary antibodies**

| <b>Antibody</b>   | <b>Company</b> | <b>Catalog No.</b> | <b>Dilution(s)</b> | <b>Applications</b> | <b>Source</b> |
|-------------------|----------------|--------------------|--------------------|---------------------|---------------|
| F4/80             | Santa Cruz     | sc-377009          | 1:200              | IF                  | Mouse         |
| Perilipin-1       | Abcam          | ab61682            | 1:200              | IF                  | Goat          |
| Bax               | Santa Cruz     | sc-7480            | 1:1000             | WB                  | Mouse         |
| Bcl-2             | Santa Cruz     | sc-492             | 1:1000             | WB                  | Rabbit        |
| LCN2              | R&D            | AF1857             | 1:1000,<br>1:200   | WB<br>IF            | Goat          |
| GAL3              | Santa Cruz     | sc-23938           | 1:1000<br>1:200    | WB<br>IF            | Rat           |
| $\alpha$ -tubulin | Sigma          | T5168              | 1:5000             | WB                  | Mouse         |
| MMP9              | Abcam          | ab38898            | 1:1000             | WB                  | Rabbit        |
| ICAM-1            | BD Bioscience  | BD554967           | 1:1000             | WB                  | Mouse         |
| ZO-1              | Santa Cruz     | sc-33725           | 1:1000             | WB                  | Rat           |
| Claudin-5         | Thermo Fisher  | 35-2500            | 1:1000             | WB                  | Mouse         |
| AQP4              | Santa Cruz     | sc-9888            | 1:200              | IF                  | Goat          |
| Albumin           | Abcam          | ab192603           | 1:200              | IF                  | Rabbit        |
| TNF- $\alpha$     | Santa Cruz     | sc-1351            | 1:1000             | WB                  | Goat          |
| TNFR1             | Santa Cruz     | sc-8436            | 1:1000             | WB                  | Mouse         |
| IL-6              | MyBioScience   | mbs3007753         | 1:1000             | WB                  | Rabbit        |
| HMGB1             | Abcam          | ab18256            | 1:1000             | WB                  | Rabbit        |
| RAGE              | Abcam          | ab3611             | 1:1000             | WB                  | Rabbit        |
| GFAP              | Sigma          | G3893              | 1:1000             | IF                  | Goat          |
| Iba-1             | Wako           | 019-19741          | 1:200              | IF                  | Rabbit        |
| $\beta$ -actin    | Sigma          | A5441              | 1:3000             | WB                  | Mouse         |

**Abbreviations:** AQP4, aquaporin4; GAL3, galectin-3; GFAP, glial fibrillary acidic protein; HMGB1, high mobility group box1; ICAM-1, intercellular adhesion molecule-1; IF, immunofluorescence; IL-6, interleukin-6; LCN2, lipocalin-2; MMP9, matrix metalloproteinase 9; RAGE, receptor for advanced glycation end products; TNF-  $\alpha$ , tumor necrosis factor- $\alpha$ ; TNFR1, tumor necrosis factor receptor1; WB, western blot; ZO-1, zonula occludens-1.
